# Supplementary material for: Synthesis and reactivity of selenium functionalised allylidynes and propargylidynes
Source: Royal Society of Chemistry journal article supplement (doi:10.1039/c8dt02370k), 2018-01-01

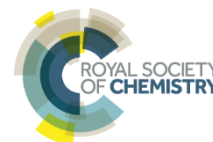

## Synthesis and Reactivity of Selenium Functionalised Allylidynes and Propargylidynes

Received 00th January 20xx,  
Accepted 00th January 20xx

Anthony F. Hill\*, Richard A. Manzano and Jas S. Ward.

DOI: 10.1039/x0xx00000x

[www.rsc.org/](http://www.rsc.org/)

---

<sup>a</sup> *Research School of Chemistry, Australian National University, Canberra, Australian Capital Territory, ACT 2601, Australia.*

†Corresponding author: Email: [a.hill@anu.edu.au](mailto:a.hill@anu.edu.au)

CCDC 1559203 - 1559205 contain the supplementary crystallographic data for this paper. These data can be obtained free of charge from The Cambridge Crystallographic Data Centre.

**<sup>1</sup>H NMR of *E*-[W{≡CC(SePh)=CHSePh}(CO)<sub>2</sub>(Tp\*)] (*E*-3)**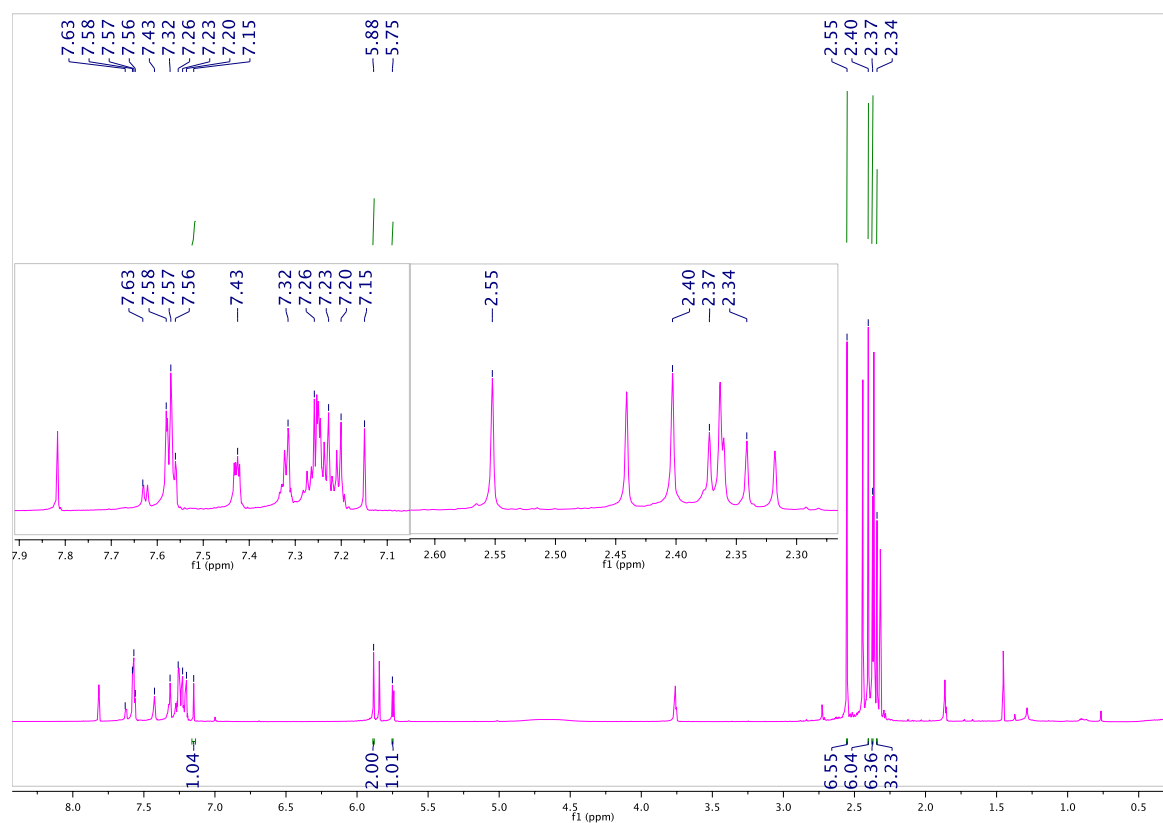**<sup>13</sup>C NMR of *E*-[W{≡CC(SePh)=CHSePh}(CO)<sub>2</sub>(Tp\*)] (*E*-3)**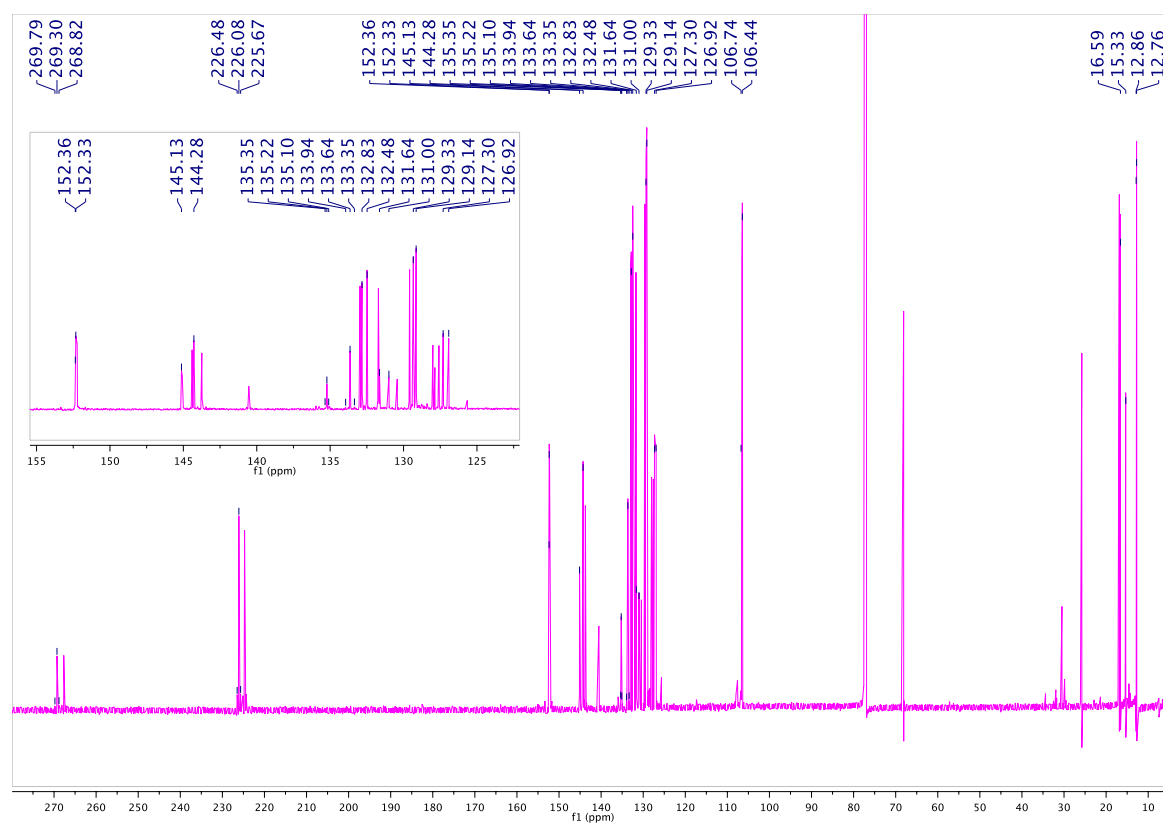

**<sup>1</sup>H NMR of Z-[W{≡CC(SePh)=CHSePh}(CO)<sub>2</sub>(Tp\*)] (Z-3)**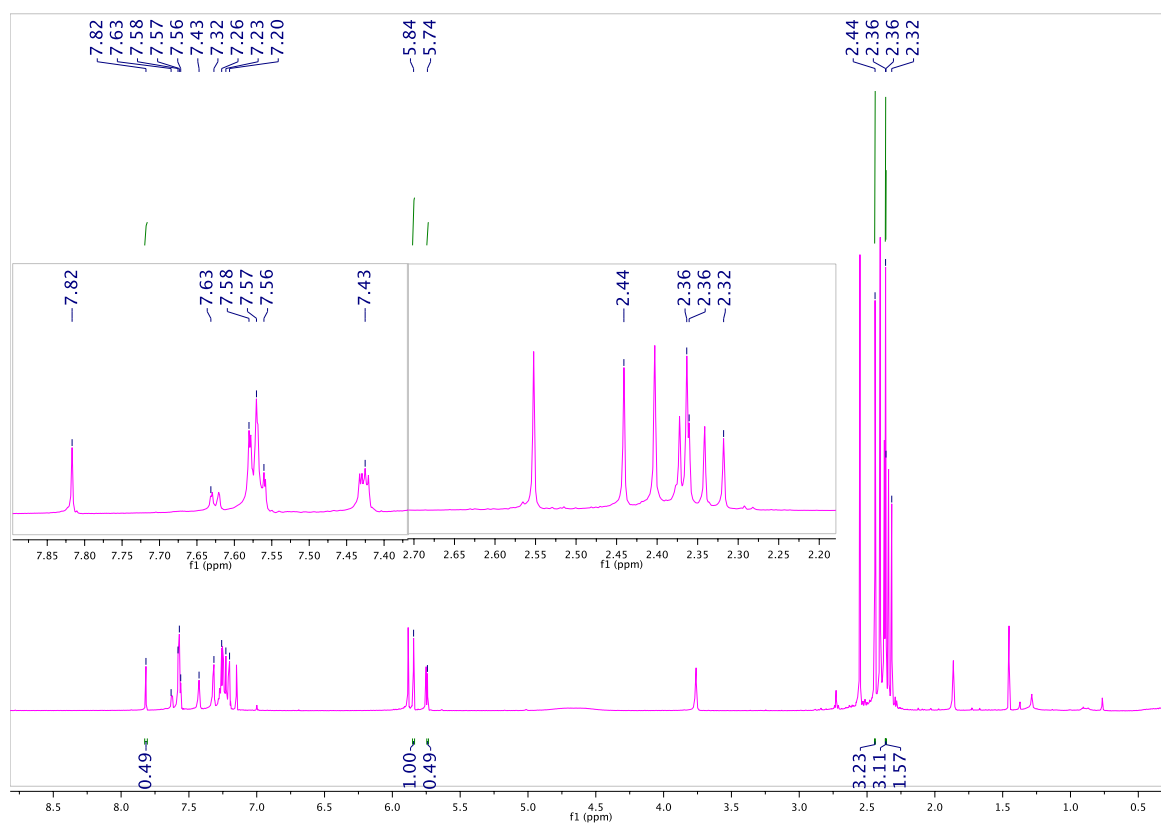**<sup>13</sup>C NMR of E-[W{≡CC(SePh)=CHSePh}(CO)<sub>2</sub>(Tp\*)] (Z-3)**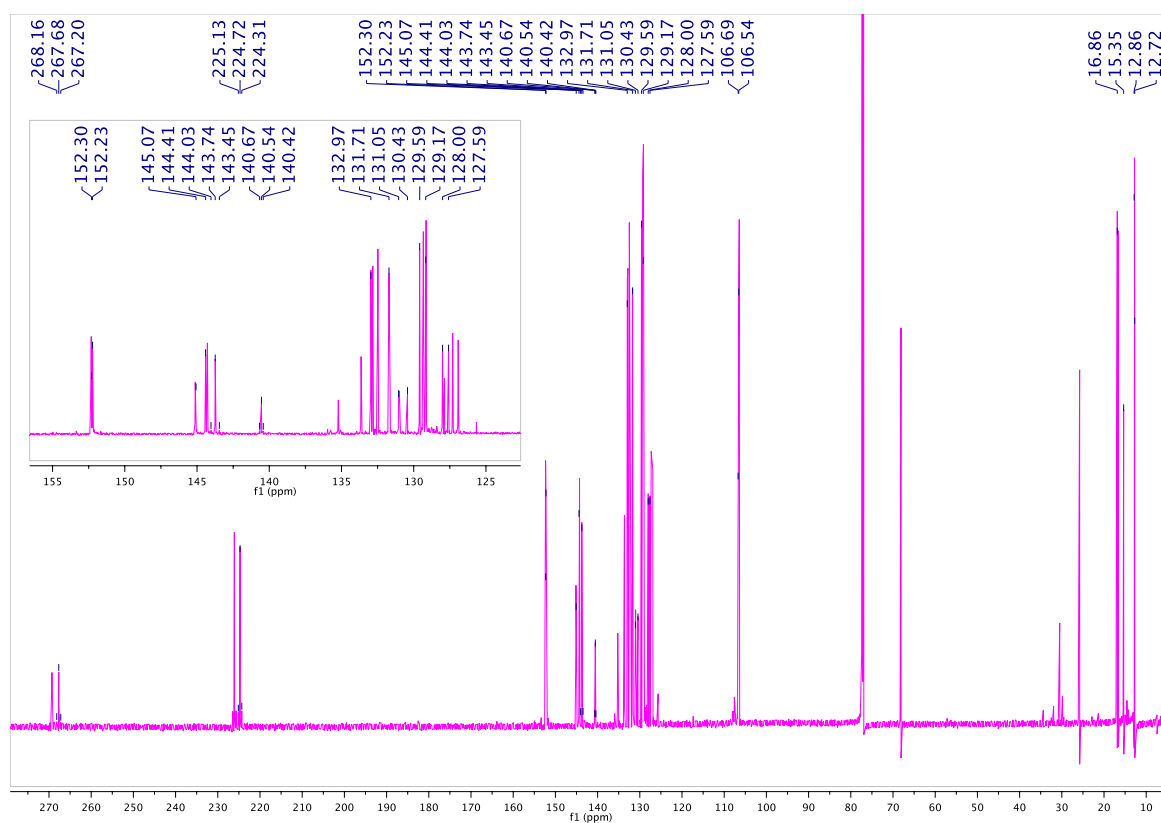

HSQC - E/Z-[W{≡CC(SePh)=CHSePh}(CO)<sub>2</sub>(Tp\*)] (E/Z-3) (Vinyl protons)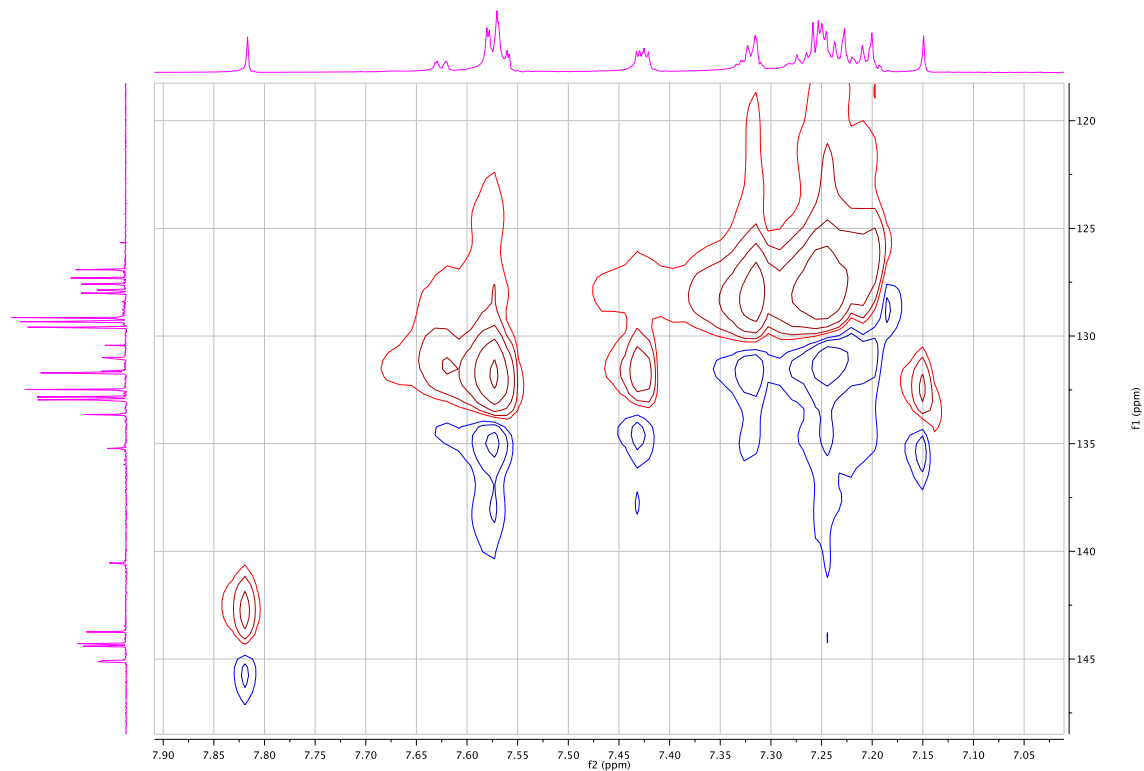HMBC - E/Z-[W{≡CC(SePh)=CHSePh}(CO)<sub>2</sub>(Tp\*)] (E/Z-3) (Vinyl protons)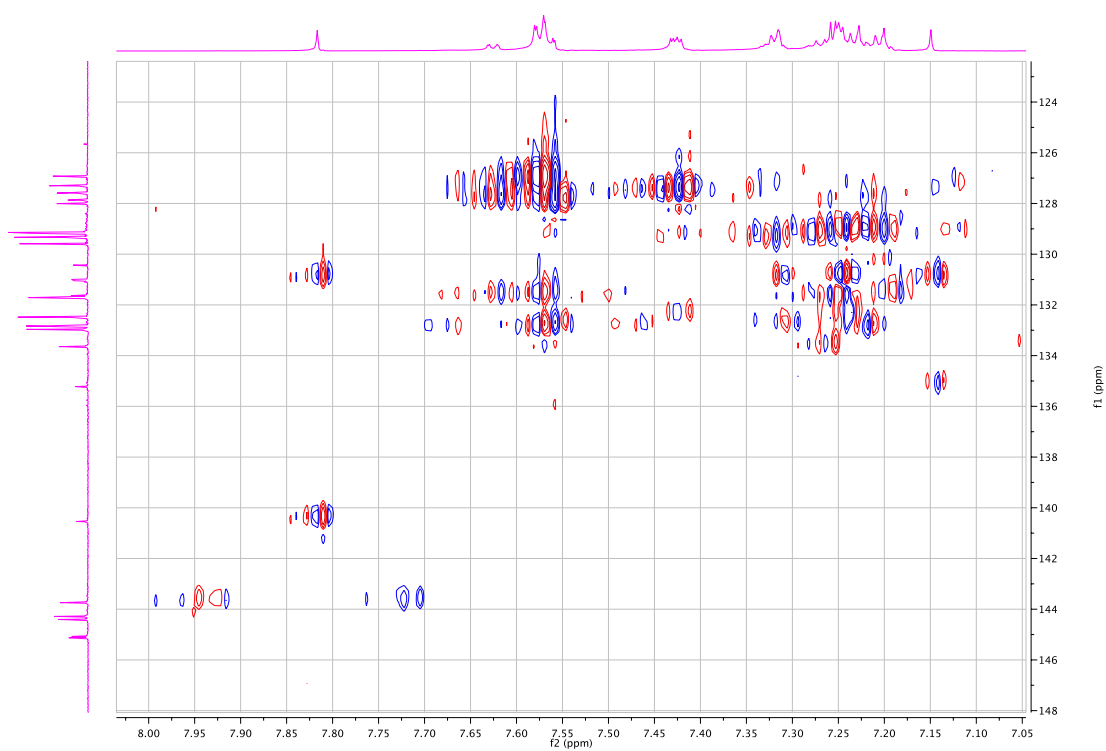

**$^1\text{H}$  NMR of  $[\text{W}(\equiv\text{CC}(\text{SePh})=\text{C}(\text{SePh})_2)(\text{CO})_2(\text{Tp}^*)]$  (4)**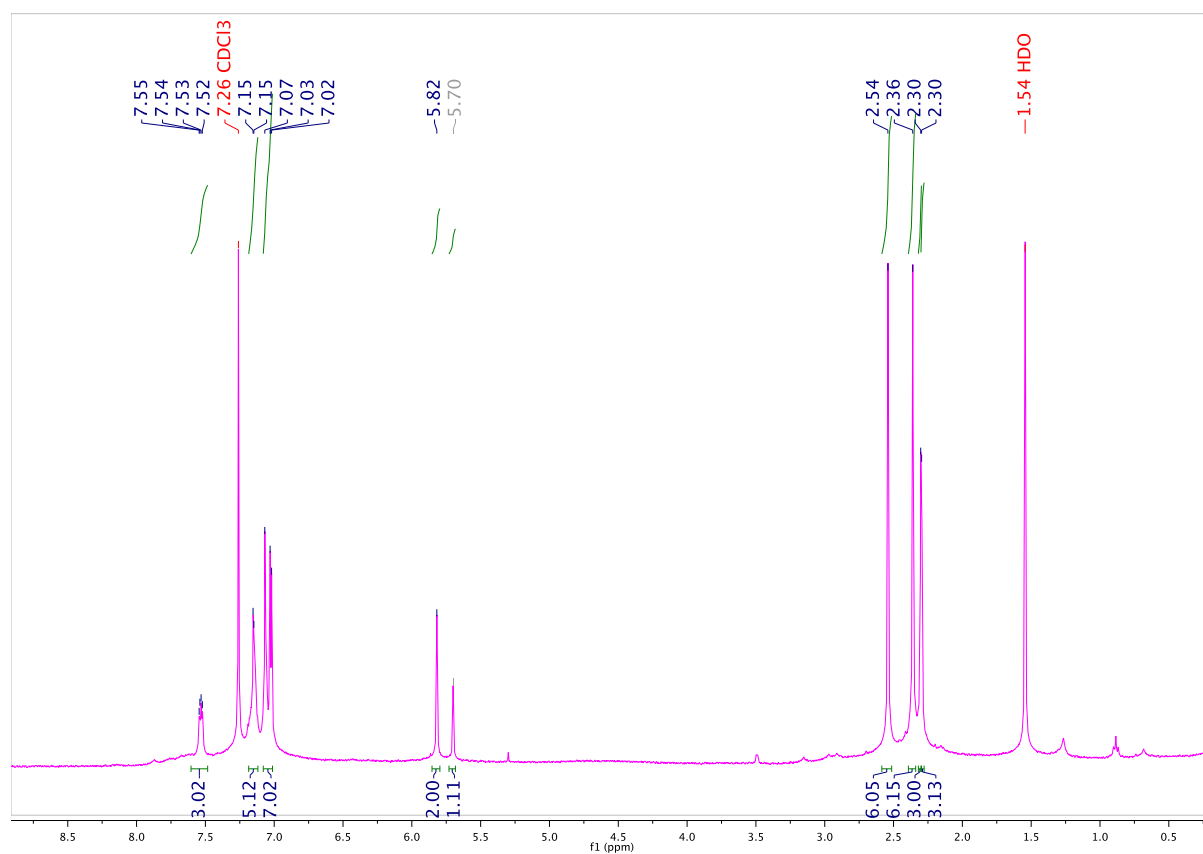 **$^1\text{H}$  NMR of  $[\text{W}(\equiv\text{CC}\equiv\text{CSePh})(\text{CO})_2(\text{Tp}^*)]$  (5) – Decomposition already present**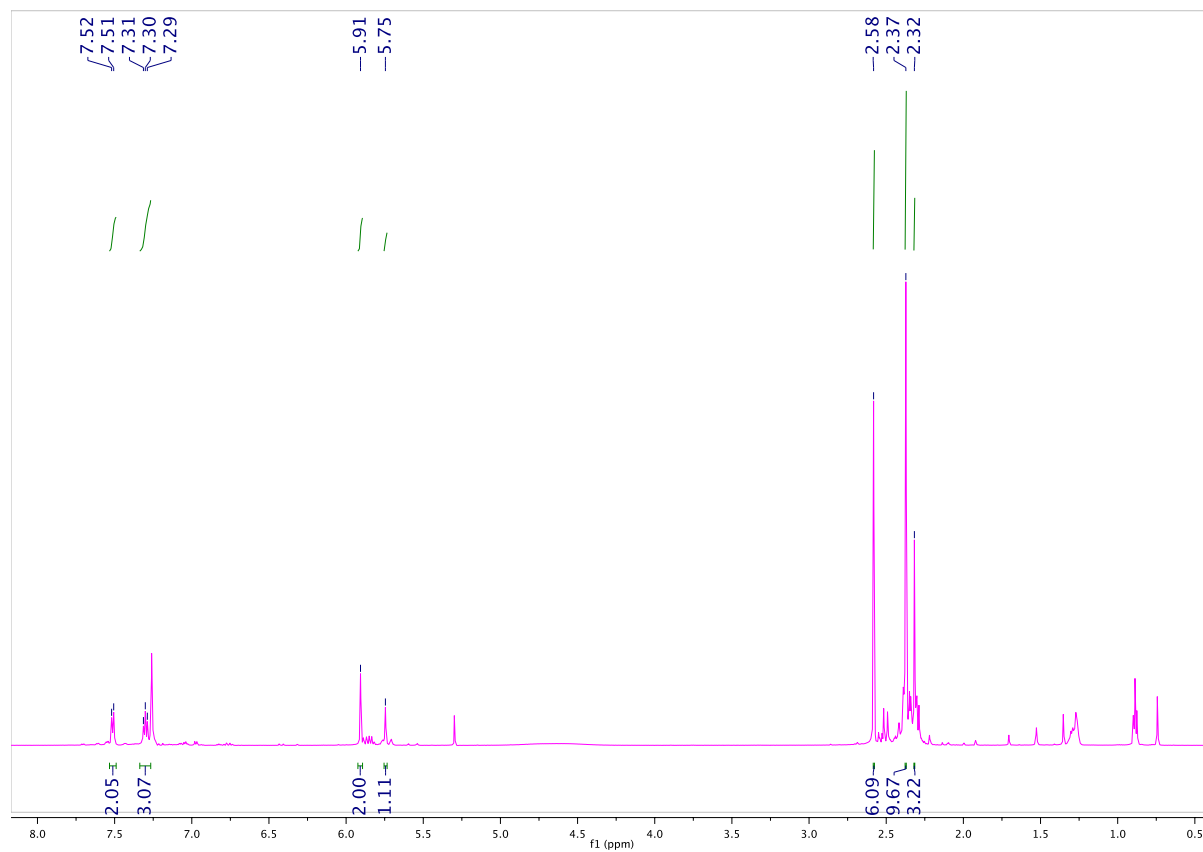

**$^{13}\text{C}$  NMR of  $[\text{W}(\equiv\text{CC}\equiv\text{CSePh})(\text{CO})_2(\text{Tp}^*)]$  (5) - Decomposition already present**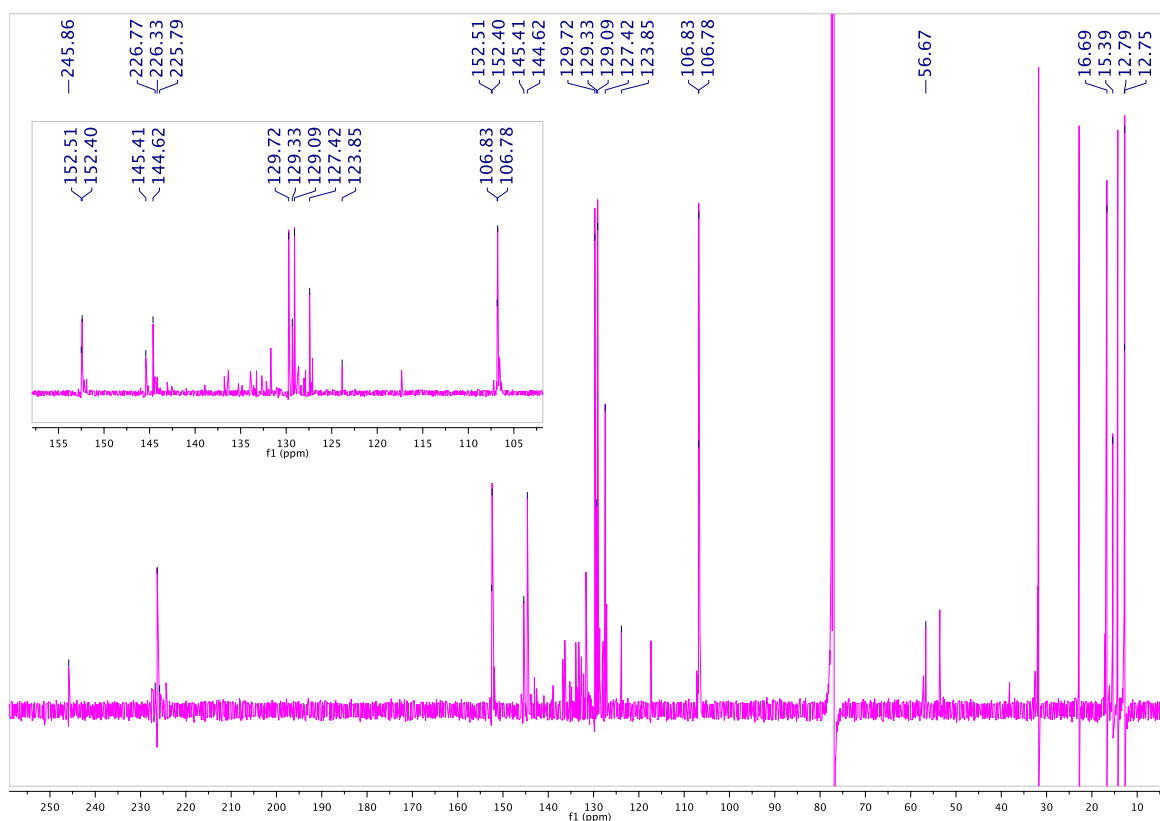 **$^1\text{H}$  NMR of  $[(\text{Tp}^*)(\text{OC})_2\text{W}\equiv\text{CC}(\text{SePh})=\text{C}(\text{SePh})-\text{C}\equiv\text{CC}\equiv\text{W}(\text{CO})_2(\text{Tp}^*)]$  (6)**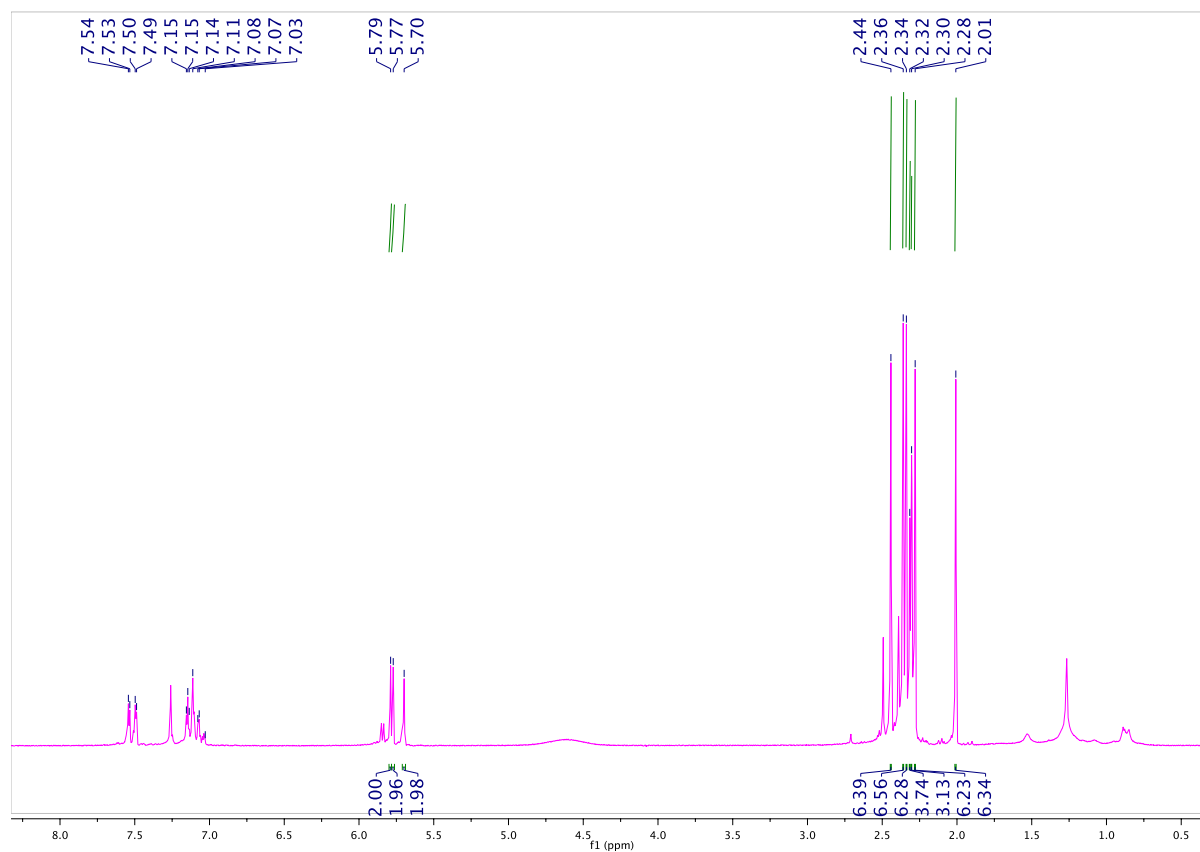

**$^{13}\text{C}$  NMR of  $[(\text{Tp}^*)(\text{OC})_2\text{W}\equiv\text{CC}(\text{SePh})=\text{C}(\text{SePh})-\text{C}\equiv\text{CC}\equiv\text{W}(\text{CO})_2(\text{Tp}^*)]$  (6)**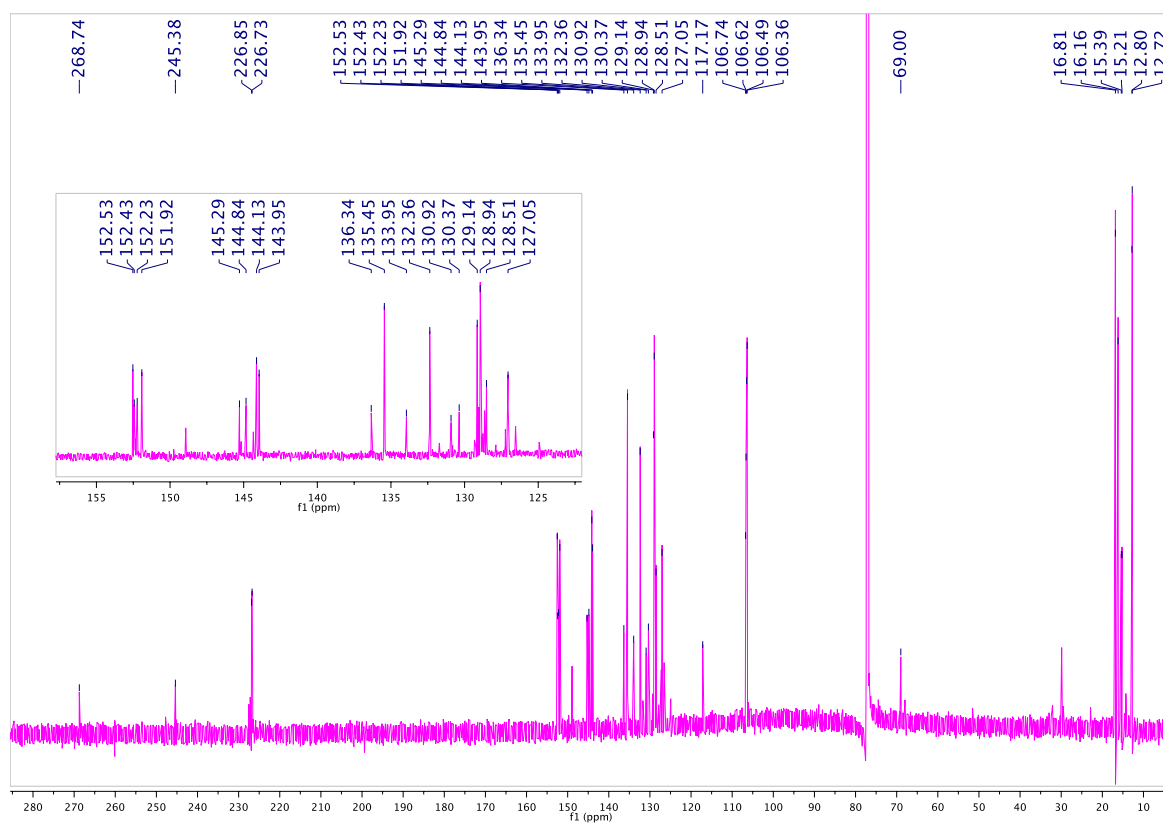

Supplement: c8dt02370k1.pdf [file c8dt02370k1.pdf]
